# Supplementary material for: Direct (Hetero)Arylation Polymerization of a Spirobifluorene and a Dithienyl-Diketopyrrolopyrrole Derivative: New Donor Polymers for Organic Solar Cells
Source: Molecules. 2018 Apr 20;23(4):962. doi: 10.3390/molecules23040962 (PMC6017812; doi:10.3390/molecules23040962)
Supplement: Supplementary file 1 [file molecules-23-00962-s001.pdf]

## **SUPPORTING INFORMATION**

# **Direct (Hetero)Arylation Polymerization of a Spirobifluorene and a Dithienyl-Diketopyrrolopyrrole Derivative: New Donor Polymers for Organic Solar Cells**

Pierre Josse,<sup>1</sup> Sergey Dayneko,<sup>2</sup> Sylvie Dabos-Seignon,<sup>1</sup> Shiming Zhang,<sup>3</sup> Philippe Blanchard,<sup>1</sup>  
Gregory C. Welch,<sup>2</sup> Clément Cabanetos<sup>1\*</sup>

<sup>1</sup>CNRS UMR 6200, MOLTECH-Anjou, University of Angers, 2 Bd Lavoisier, 49045 Angers, France

<sup>2</sup>Department of Chemistry, University of Calgary, 2500 University Drive N.W., Calgary, Alberta T2N 1N4, Canada

<sup>3</sup>Key Laboratory of Flexible Electronics (KLOFE) & Institute of Advanced Materials (IAM), Jiangsu National Synergetic Innovation Center for Advanced Materials (SICAM), Nanjing Tech University, 30 South Puzhu Road, Nanjing 211816, Jiangsu, P. R. China

Corresponding author: [clement.cabanetos@univ-angers.fr](mailto:clement.cabanetos@univ-angers.fr)

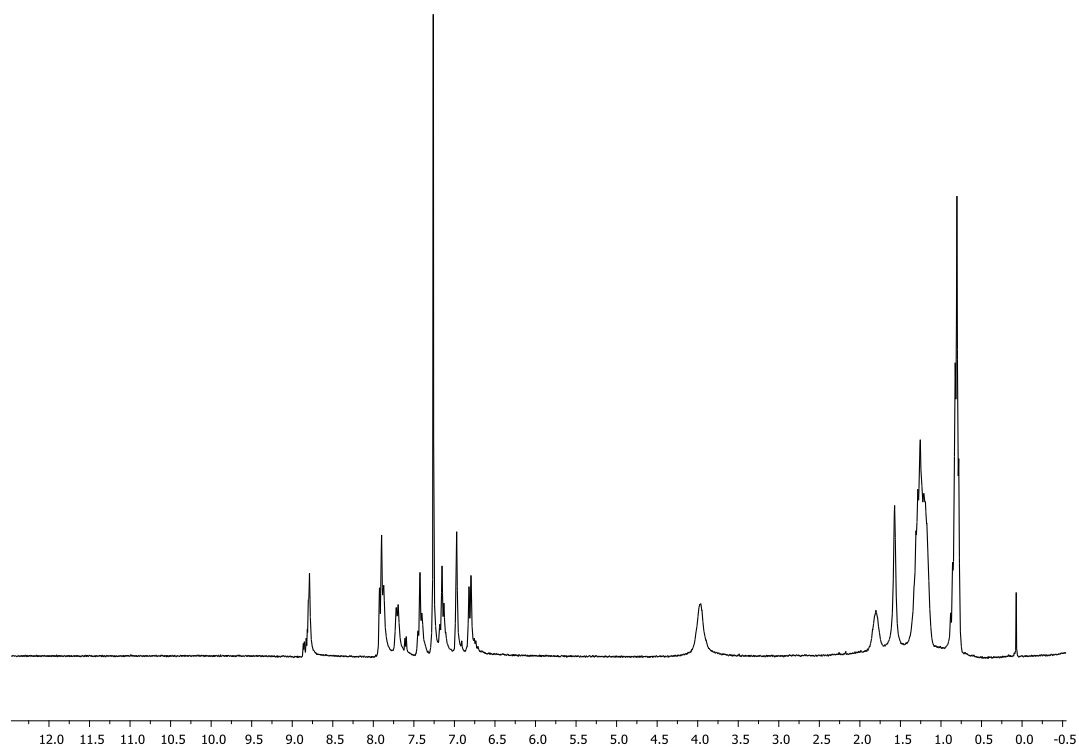

Figure S1.  $^1\text{H}$  NMR of **P1** in  $\text{CDCl}_3$

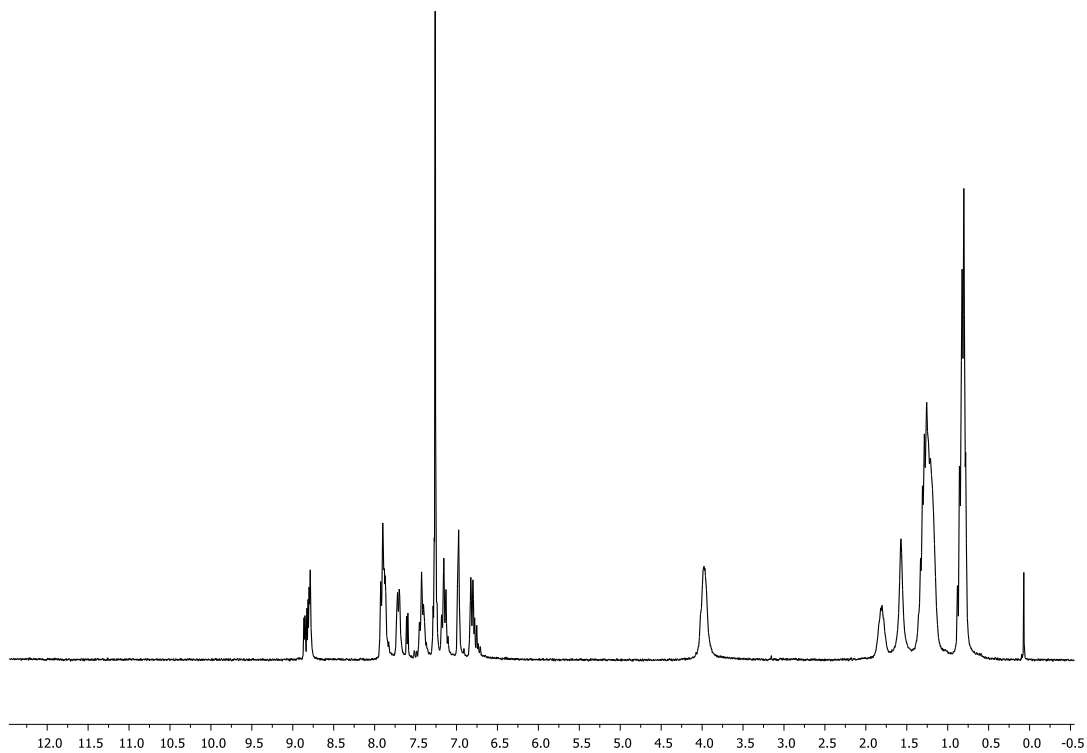

Figure S2.  $^1\text{H}$  NMR of **P2** in  $\text{CDCl}_3$

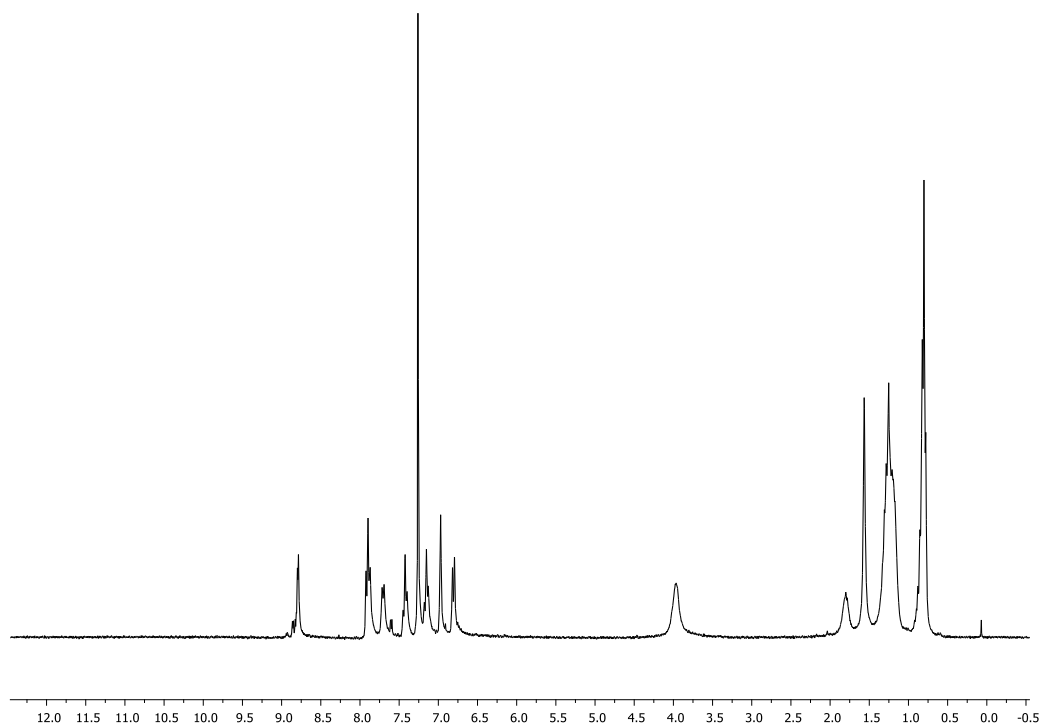

Figure S3.  $^1\text{H}$  NMR of **P4** in  $\text{CDCl}_3$

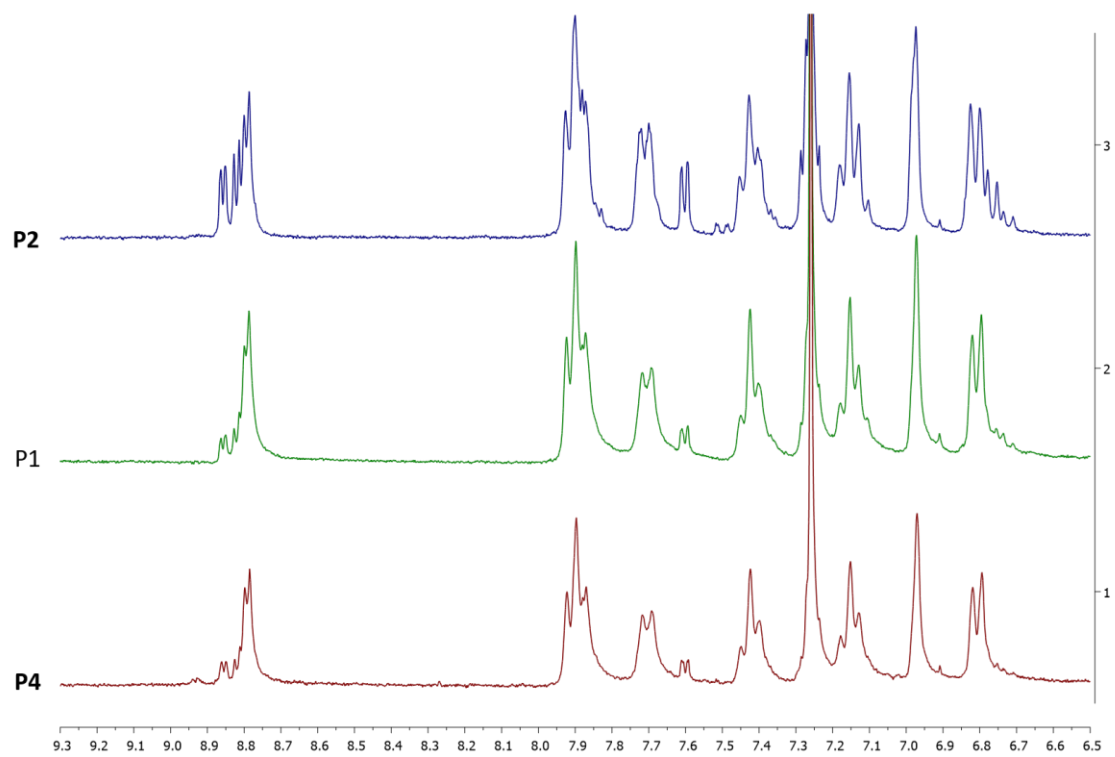

Figure S4. Comparative  $^1\text{H}$  NMR of **P1** (green); **P2** (blue) and **P4** (red) in  $\text{CDCl}_3$

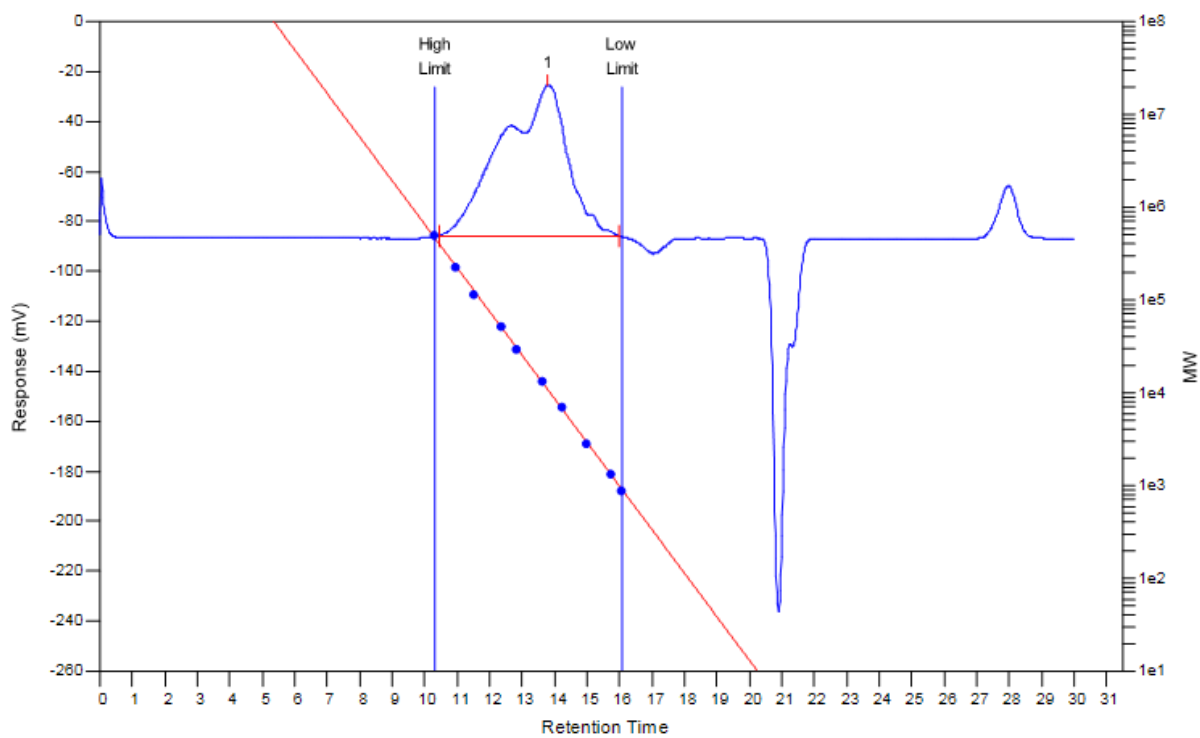

Figure S5. GPC curve obtained for polymer P1

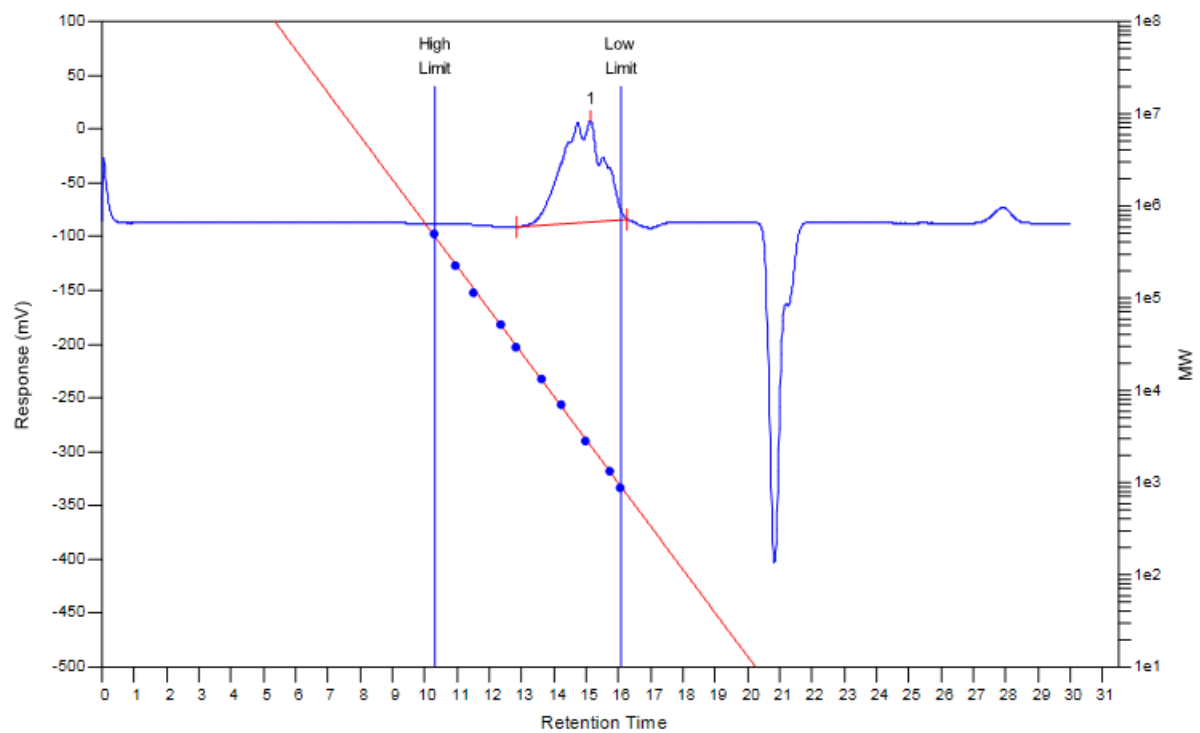

Figure S6. GPC curve obtained for polymer P2

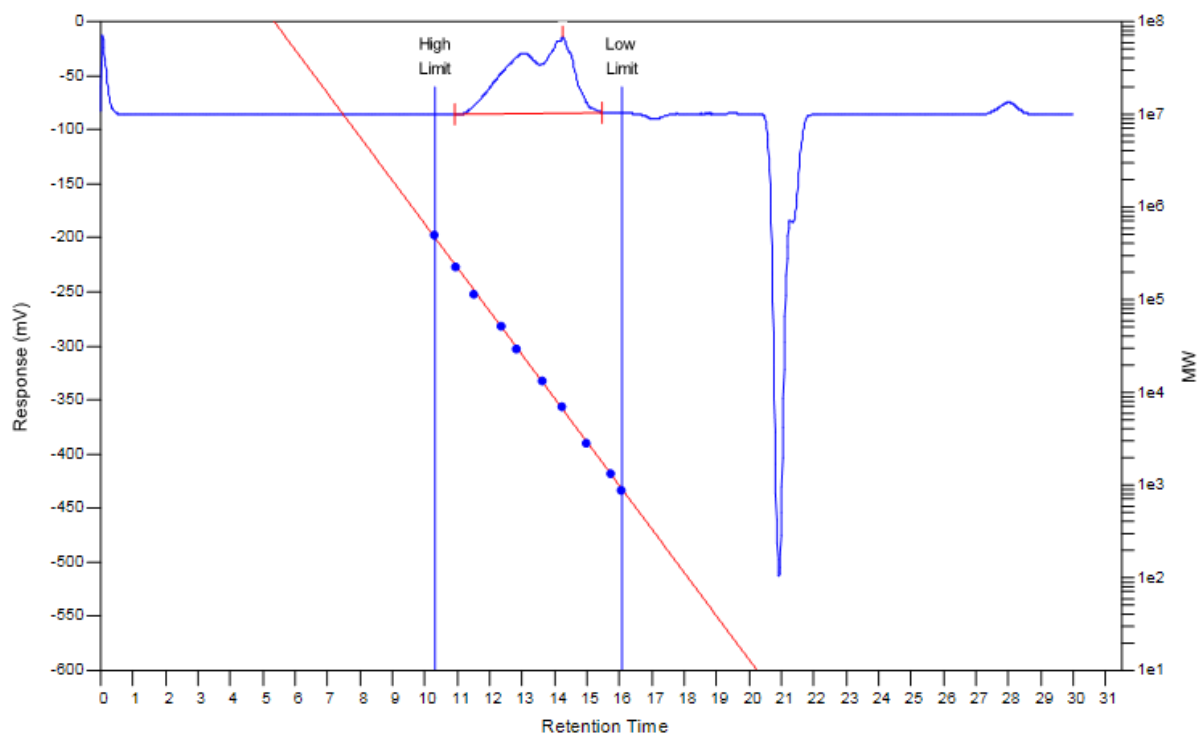

Figure S7. GPC curve obtained for polymer P4

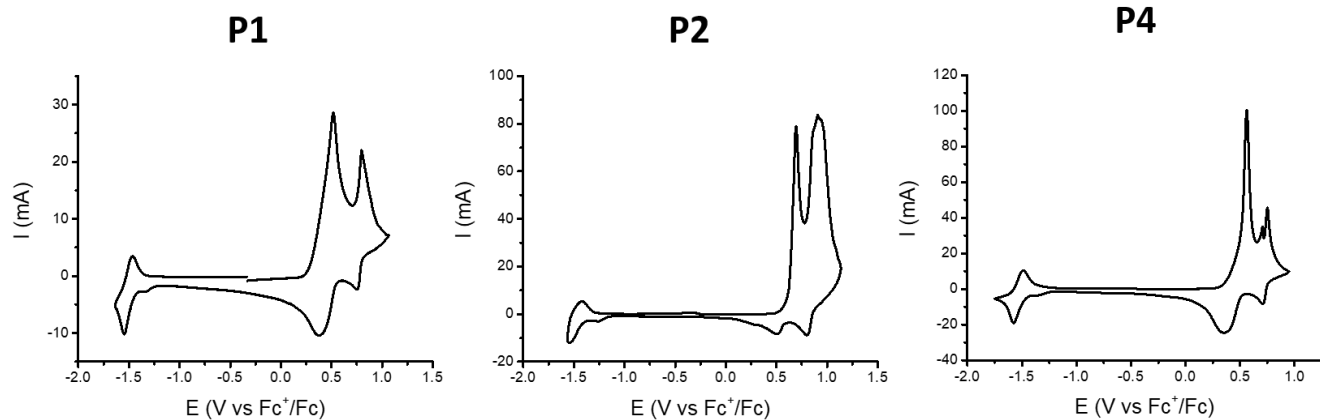

Figure S8. Cyclic voltammogram of **P1**, **P2** and **P4**. Films drop-cast from a  $\text{CHCl}_3$  solution ( $5 \text{ mg.mL}^{-1}$ ) on a Pt WE ; Pt wire CE ; Ag wire pseudo ref ;  $\text{Fc}^+/\text{Fc}$  ref ;  $100 \text{ mV.s}^{-1}$  in acetonitrile/ $\text{NBu}_4\text{PF}_6$  ( $0.1 \text{ M}$ )

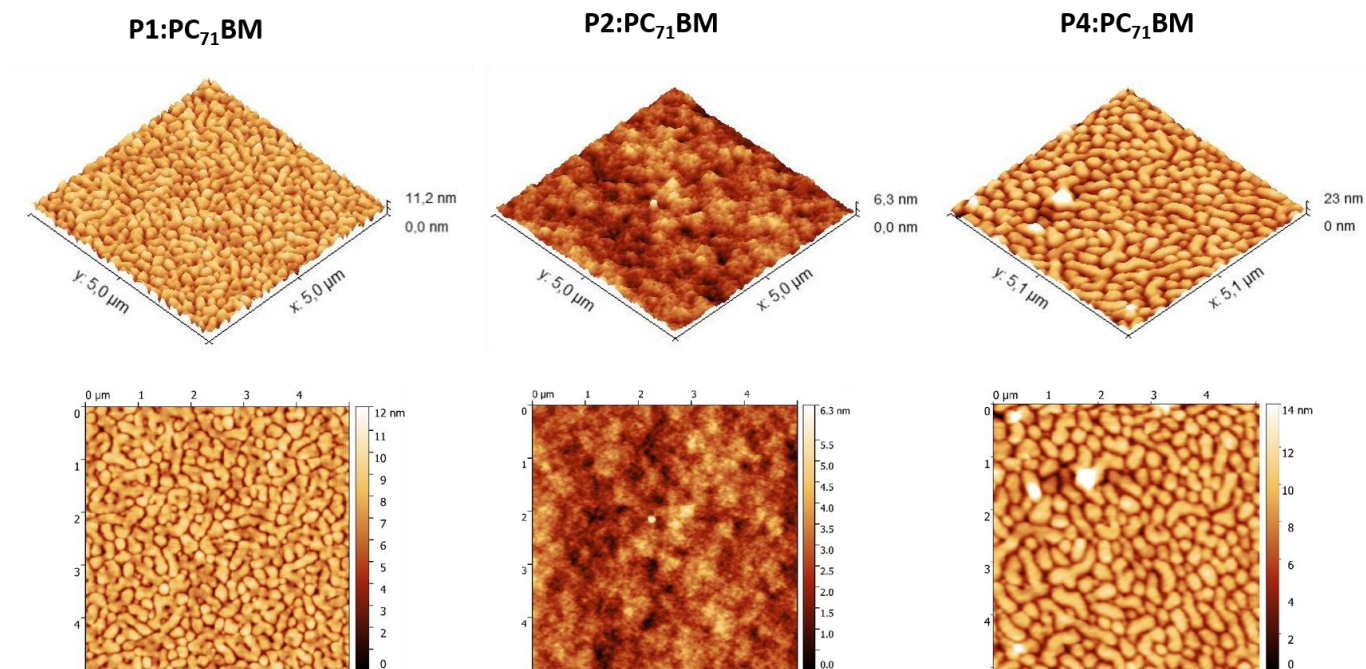

Figure S9. 3D AFM images of **P1**, **P2** and **P4** based active layers
